# Supplementary material for: Design of Na3MnZr(PO4)3/Carbon Nanofiber Free-Standing Cathodes for Sodium-Ion Batteries with Enhanced Electrochemical Performances through Different Electrospinning Approaches
Source: MDPI journal article supplement (doi:10.3390/molecules29081885), 2024-04-20
Supplement: s1 [file s1]

## Supplementary

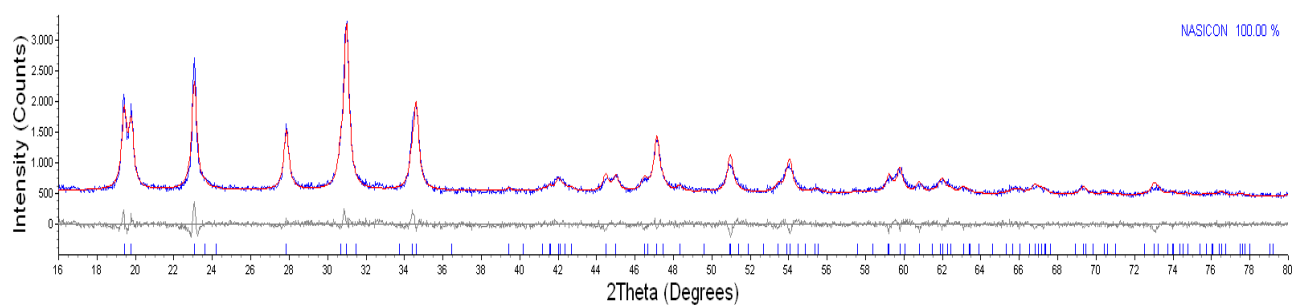

Figure S1. Rietveld refinement of the X-ray diffraction data of the p-MnZr sample. Experimental pattern (blue line), calculated pattern (red line), difference curve (grey line). Peaks position of the  $\text{Na}_3\text{MnTi}(\text{PO}_4)_3$  phase (blue bars on the bottom).

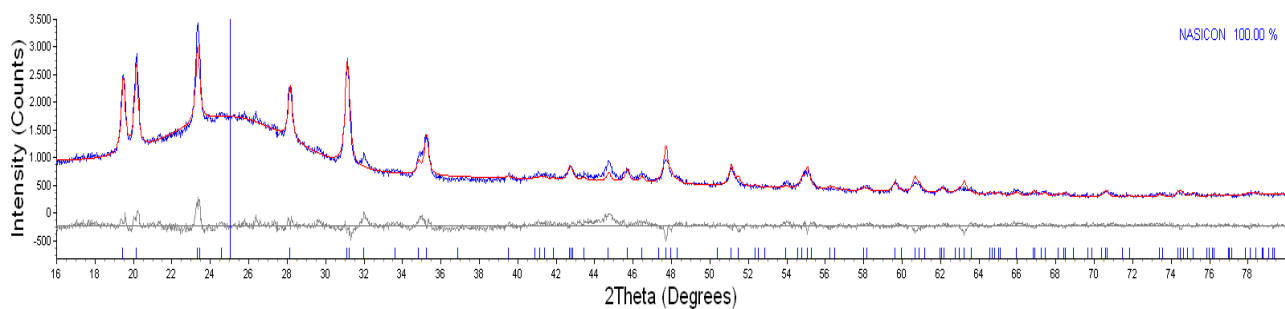

(a)

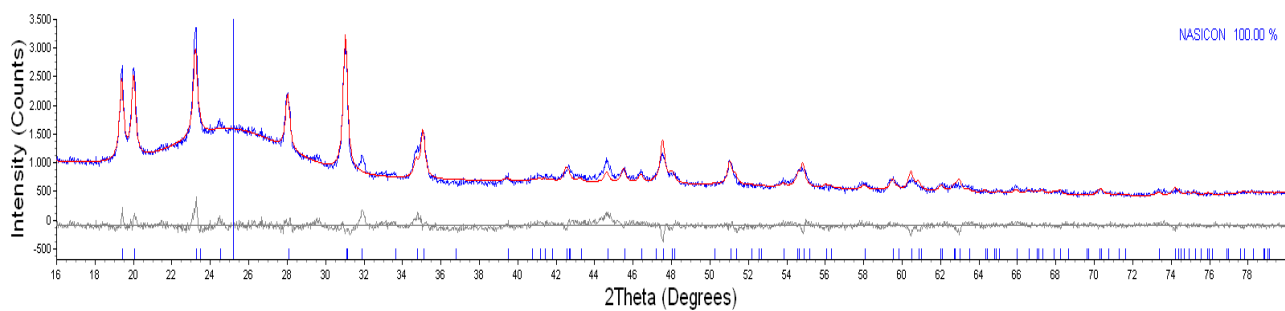

(b)

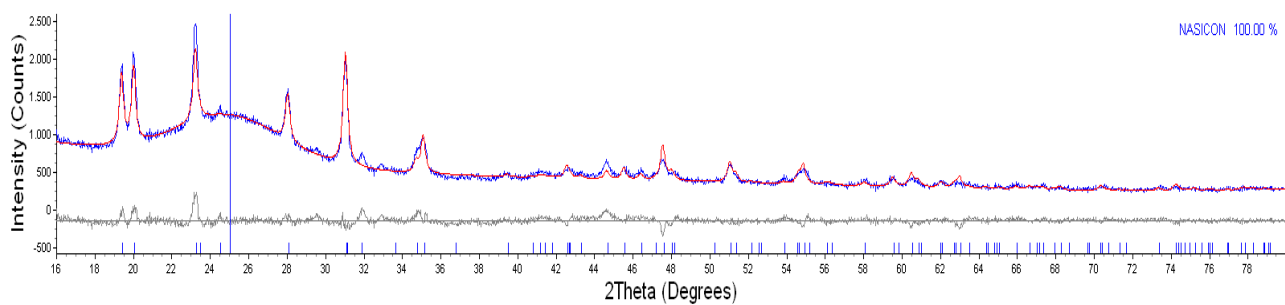

(c)

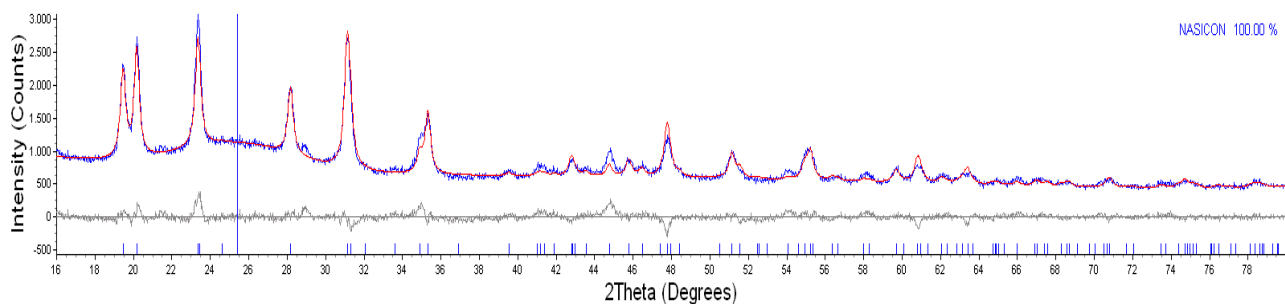

(d)

Figure S2. Rietveld refinement of the X-ray diffraction data of the a) h-10%MnZr/CNF, b) h-30%MnZr/CNF c) v-30%MnZr/CNF and d) dd-MnZr/CNF samples. Experimental pattern (blue line), calculated pattern (red line), difference curve (grey line). Peaks position of the  $\text{Na}_3\text{MnTi}(\text{PO}_4)_3$  phase (blue bars on the bottom). The refined position of the broad peak of the amorphous CNF phase is indicated by the blue vertical line.

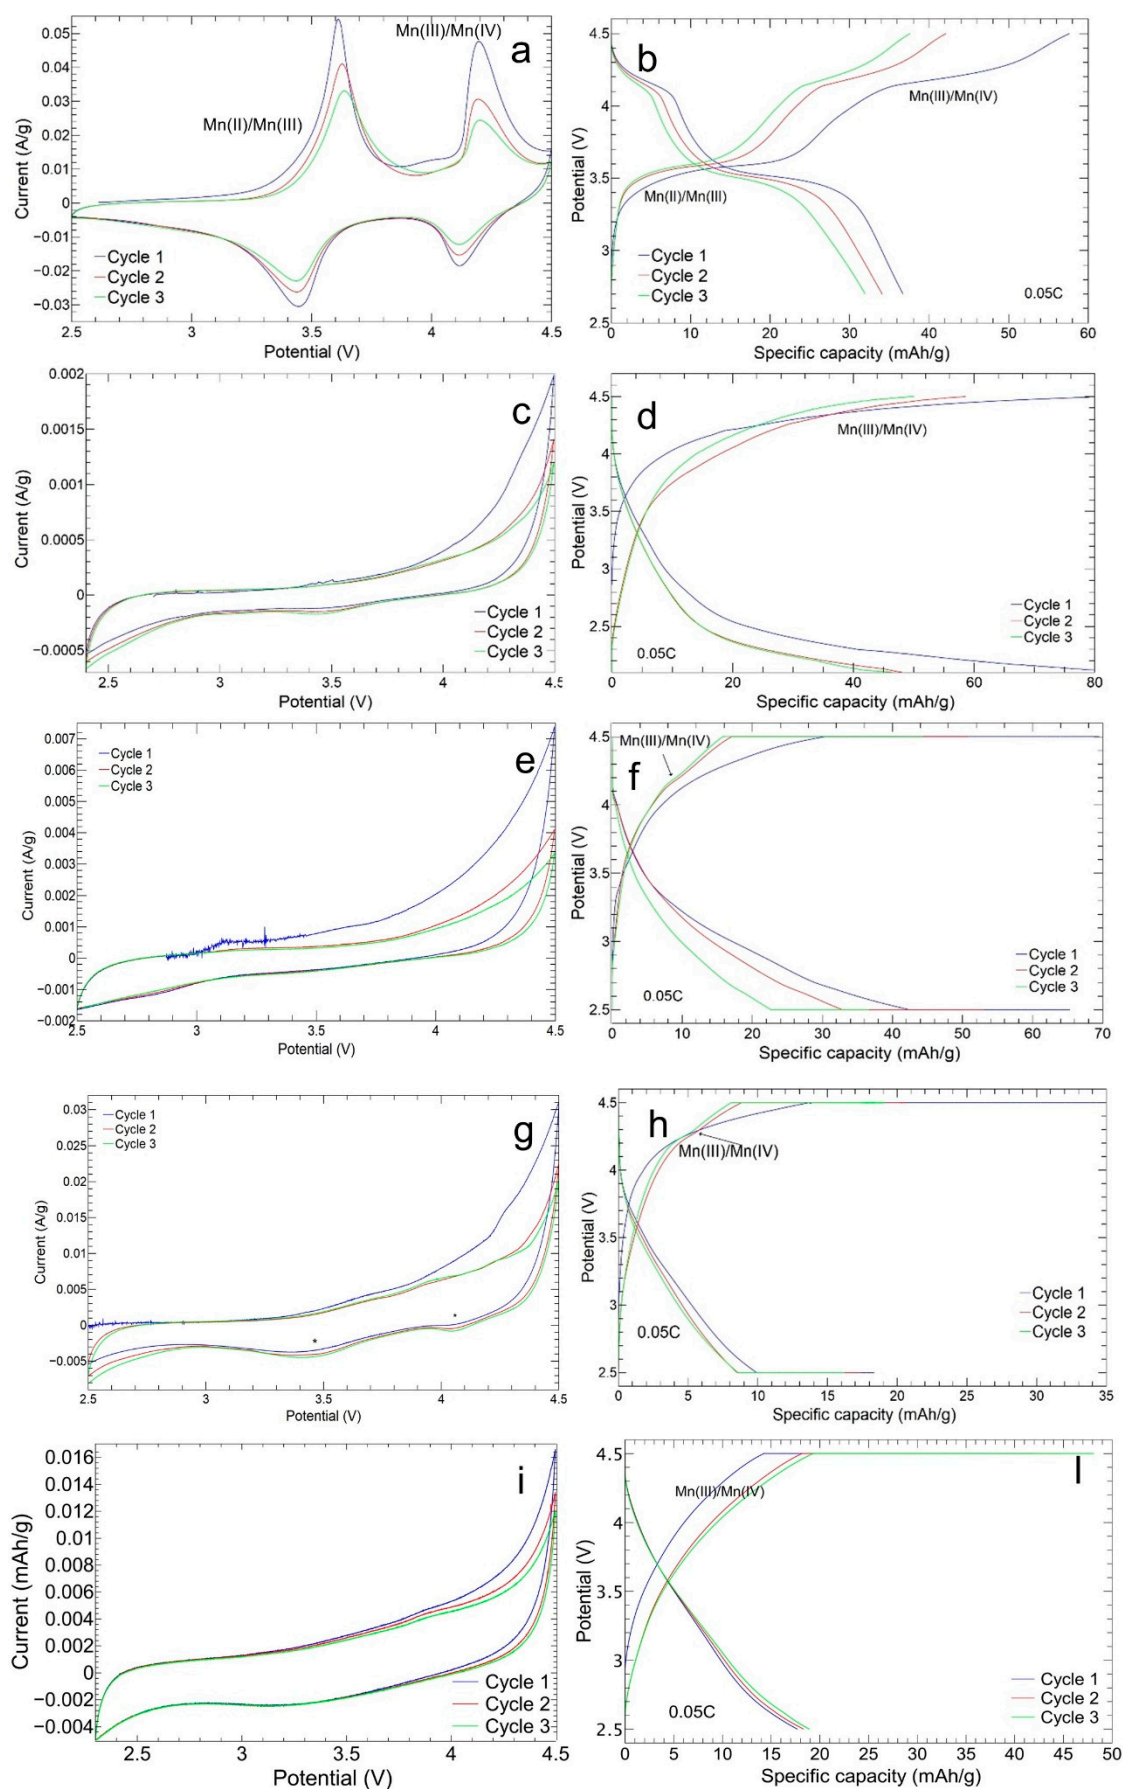

Figure S3. CV and charge/discharge curves of slurry p-MnZr (a,b), h-10%MnZr/CNF (c,d), h-30%MnZr/CNF (e,f), v-30%MnZr/CNF (g,h), and dd-MnZr/CNF (i,l) cathodes.

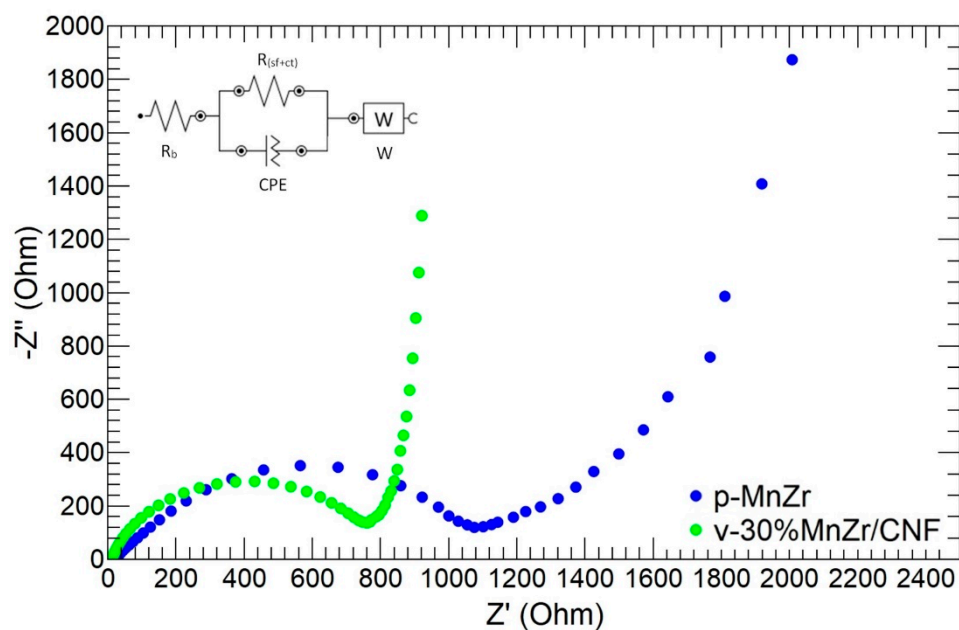

Figure S4. Nyquist plot of the v-30%MnZr/CNF and p-MnZr cathodes. The equivalent circuit is shown in the inset.  $R_b$ : electrolyte resistance;  $R_{(sf+ct)}$ : surface and charge transfer resistance; W: Warburg impedance.

Table S1. Refined lattice parameters, cell volume, crystallite size, weighted-pattern discrepancy factor and Goodness of Fit of the NASICON-structured  $\text{Na}_3\text{MnZr}(\text{PO}_4)_3$  phase obtained by Rietveld refinement of MnTi and MnTi/CNF samples.

| SAMPLE                | p-MnZr     | dd-MnZr/CNF | h-10%MnZr/CNF | h-30%MnZr/CNF | v-30%MnZr/CNF |
|-----------------------|------------|-------------|---------------|---------------|---------------|
| $a$ (Å)               | 8.970(1)   | 8.794(1)    | 8.818(1)      | 8.844(1)      | 8.840(1)      |
| $c$ (Å)               | 22.585 (5) | 22.742(4)   | 22.740(4)     | 22.705(4)     | 22.709(4)     |
| $V$ (Å <sup>3</sup> ) | 175.45     | 173.20      | 173.66        | 173.90        | 173.85        |
| $c/a$                 | 2.518      | 2.586       | 2.578         | 2.567         | 2.569         |
| Crystallite size (nm) | 30(1)      | 28(1)       | 40(1)         | 37(1)         | 36(1)         |
| $R_{wp}$              | 5.51       | 6.26        | 6.67          | 6.13          | 6.79          |
| S                     | 1.41       | 1.75        | 1.83          | 1.76          | 1.62          |
